# Supplementary material for: High-Performance Full Sodium Cells Based on MgO-Treated P2-Type Na0.67(Mn0.5Fe0.5)1−xCoxO2 Cathodes
Source: MDPI journal article supplement (doi:10.3390/batteries9100497), 2023-09-28
Supplement: s1 [file s1]

# High-performance full sodium cells based on MgO-treated P2-type $\text{Na}_{0.67}(\text{Mn}_{0.5}\text{Fe}_{0.5})_{1-x}\text{Co}_x\text{O}_2$ cathodes

Nermin Taskiran<sup>1</sup>, Sebahat Altundag<sup>1</sup>, Violeta Koleva<sup>2</sup>, Emine Altin<sup>3</sup>, Muhammad Arshad<sup>4</sup>, Sevda Avci<sup>5</sup>, M. Nurullah Ates<sup>6,7</sup>, Serdar Altin<sup>1\*</sup>, Radostina Stoyanova<sup>2\*</sup>

- <sup>1</sup> Physics Department, Inonu University, 44280, Malatya, Turkey; e-mail: [754824@meb.k12.tr](mailto:754824@meb.k12.tr) (NK), [sebahat.altundag@inonu.edu.tr](mailto:sebahat.altundag@inonu.edu.tr) (SA), [serdar.altin@inonu.edu.tr](mailto:serdar.altin@inonu.edu.tr) (SA)
- <sup>2</sup> Institute of General and Inorganic Chemistry, Bulgarian Academy of Sciences, 1113 Sofia, Bulgaria; e-mail: [vkoleva@svr.igic.bas.bg](mailto:vkoleva@svr.igic.bas.bg) (VK), [radstoy@svr.igic.bas.bg](mailto:radstoy@svr.igic.bas.bg) (RS)
- <sup>3</sup> Vocational School of Health Service, Inonu University, 44280, Malatya, Turkey; e-mail: [emine.altin@inonu.edu.tr](mailto:emine.altin@inonu.edu.tr)
- <sup>4</sup> Nanoscience & Technology Department, National Centre for Physics, 45320, Islamabad, Pakistan; e-mail: [muhammad.arshad@ncp.edu.pk](mailto:muhammad.arshad@ncp.edu.pk)
- <sup>5</sup> Physics Department, Istanbul Medeniyet University, Istanbul; e-mail: [sevda.avci@medeniyet.edu.tr](mailto:sevda.avci@medeniyet.edu.tr)
- <sup>6</sup> Bogazici University, Department of Chemistry, Bebek 34342, Istanbul, Turkey; e-mail: [mehmet.ates@boun.edu.tr](mailto:mehmet.ates@boun.edu.tr)
- <sup>7</sup> TÜBİTAK Rail Transport Technologies Institute, Energy Storage Division, TÜBİTAK Gebze Campus, 41470 Gebze, Kocaeli, Turkey; e-mail: [mehmet.ates@tubitak.gov.tr](mailto:mehmet.ates@tubitak.gov.tr)
- \* Correspondence: [radstoy@svr.igic.bas.bg](mailto:radstoy@svr.igic.bas.bg) (RS), [serdar.altin@inonu.edu.tr](mailto:serdar.altin@inonu.edu.tr) (SA)

**Citation:** To be added by editorial staff during production.

Academic Editor: Firstname Last-name

Received: date

Revised: date

Accepted: date

Published: date

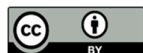

**Copyright:** © 2023 by the authors. Submitted for possible open access publication under the terms and conditions of the Creative Commons Attribution (CC BY) license (<https://creativecommons.org/licenses/by/4.0/>).

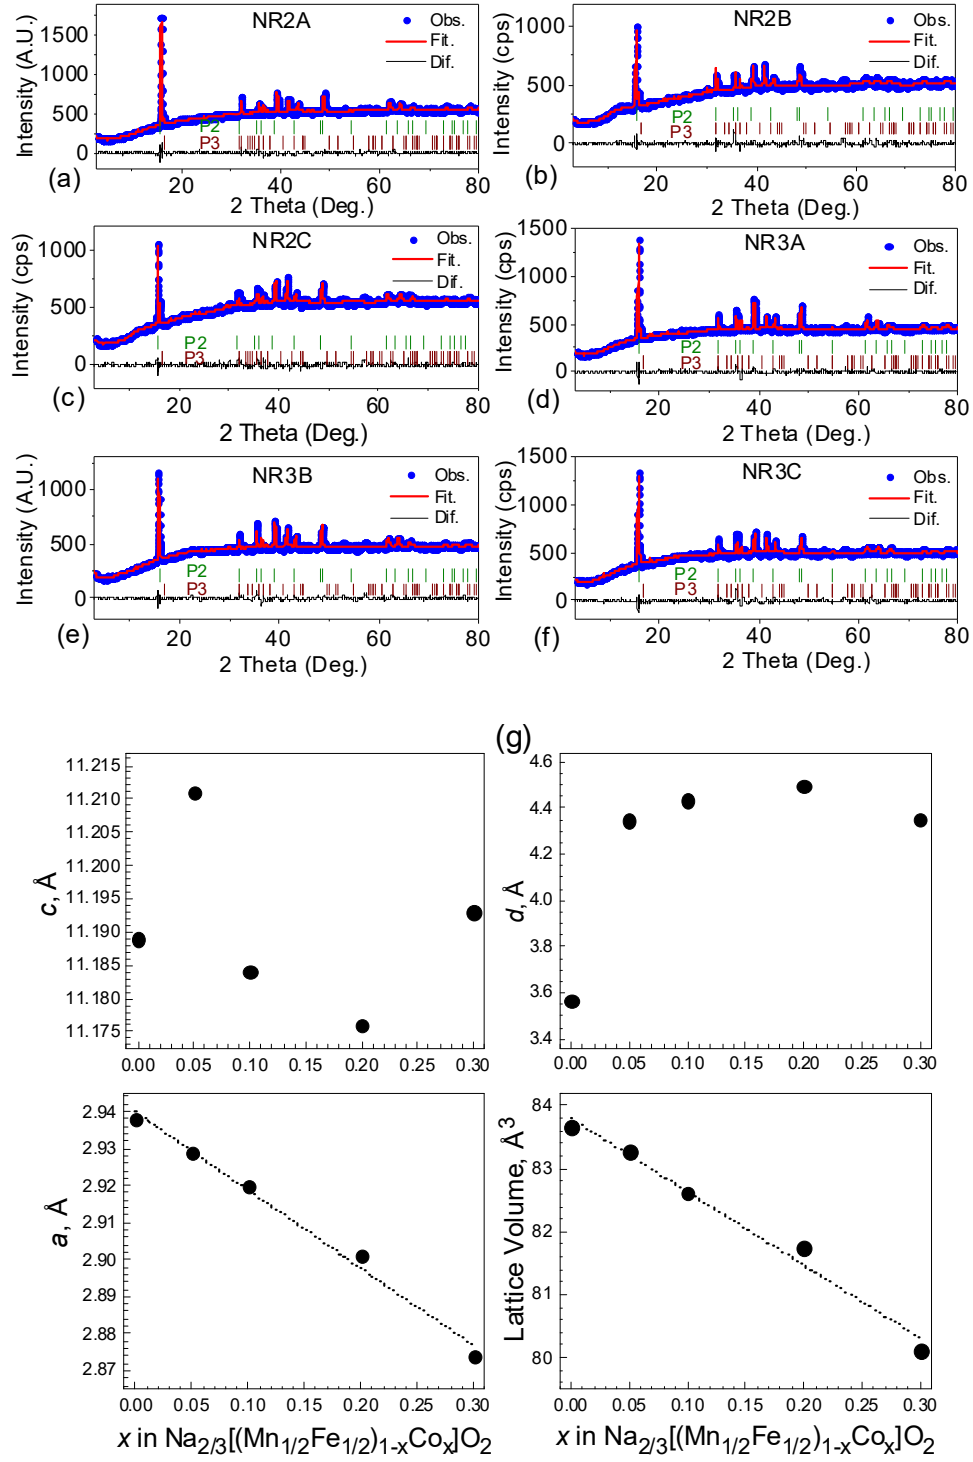

**Figure S1:** Rietveld-refined x-ray diffraction patterns (a) NR2A, (b) NR2B, (c) NR2C and (d) NR3A, (e) NR3B (f) NR3C, (g) the dependence of the lattice parameters ( $a$ ,  $c$ , and volume) and the interlayer distance (denoted as  $d$ ) of the P2-oxides on the Co content

**Table S1.** The calculated lattice parameters, Na-layer distance, and weighted R (wR%) factor for Co-doped and MgO-treated oxides.

| Sample Code    | Phase | a (Å)        | b (Å)      | c (Å)       | V(Å <sup>3</sup> ) | Na layer dist.(Å) | Phase Ratio % | wR % |
|----------------|-------|--------------|------------|-------------|--------------------|-------------------|---------------|------|
| P2 struc. [32] | P2    | 2.878        |            | 11.163      |                    | 3.635             | -             | -    |
| P3 struc.*     | P3    | 5.63         | 2.86       | 5.77        | 85.58              |                   | -             | -    |
| NR-0           | P2    | 2.938 (±3)   |            | 11.189 (±2) | 83.66 (±21)        | 3.567             | -             | 2.85 |
| NR-1           | P2    | 2.929 (±3)   |            | 11.211 (±1) | 83.27 (±18)        | 4.345             | 99.87         | 2.76 |
|                | P3    | 2.862 (±2)   | 5.631 (±2) | 5.779 (±4)  | 85.85 (±14)        |                   | 0.13          |      |
| NR-2           | P2    | 2.920 (±3)   |            | 11.184 (±2) | 82.61 (±21)        | 4.434             | 99.56         | 3.15 |
|                | P3    | 2.863 (±2)   | 5.633 (±1) | 5.781 (±3)  | 86.06 (±15)        |                   | 0.44          |      |
| NR-2A          | P2    | 2.917 (±3)   |            | 11.210 (±1) | 82.61 (±17)        | 4.438             | 98.15         | 2.58 |
|                | P3    | 2.871 (±4)   | 5.623 (±2) | 5.791 (±4)  | 86.13 (±21)        |                   | 1.85          |      |
| NR-2B          | P2    | 2.914 (±3)   |            | 11.184 (±2) | 82.28 (±20)        | 4.367             | 97.73         | 2.38 |
|                | P3    | 2.862 (±4)   | 5.643 (±3) | 5.811 (±2)  | 86.61 (±23)        |                   | 2.27          |      |
| NR-2C          | P2    | 2.901 (±4)   |            | 11.208 (±2) | 82.18 (±27)        | 4.296             | 98.36         | 2.59 |
|                | P3    | 2.871 (±2)   | 5.633 (±1) | 5.821 (±4)  | 87.23 (±26)        |                   | 1.64          |      |
| NR-3           | P2    | 2.906 (±4)   |            | 11.176 (±2) | 81.74 (±22)        | 4.497             | 99.35         | 2.73 |
|                | P3    | 2.841 (±2)   | 5.613 (±3) | 5.831 (±4)  | 85.66 (±21)        |                   | 0.65          |      |
| NR-3A          | P2    | 2.899 (±5)   |            | 11.166 (±3) | 81.29 (±32)        | 4.317             | 97.98         | 3.23 |
|                | P3    | 2.851 (±3)   | 5.633 (±2) | 5.851 (±3)  | 83.81 (±22)        |                   | 2.02          |      |
| NR-3B          | P2    | 2.888 (±0.5) |            | 11.253 (±4) | 81.28 (±32)        | 4.432             | 98.44         | 2.71 |
|                | P3    | 2.858 (±1)   | 5.643 (±4) | 5.891 (±3)  | 83.18 (±26)        |                   | 1.56          |      |
| NR-3C          | P2    | 2.889 (±5)   |            | 11.208 (±3) | 81.02 (±29)        | 4.291             | 96.53         | 2.49 |
|                | P3    | 2.866 (±2)   | 5.666 (±4) | 5.874 (±2)  | 85.07 (±21)        |                   | 3.47          |      |
| NR-4           | P2    | 2.874 (±3)   |            | 11.193 (±7) | 80.11 (±10)        | 4.349             | 98.93         | 2.84 |
|                | P3    | 2.886 (±4)   | 5.686 (±4) | 5.844 (±4)  | 88.34 (±16)        |                   | 1.07          |      |

\*

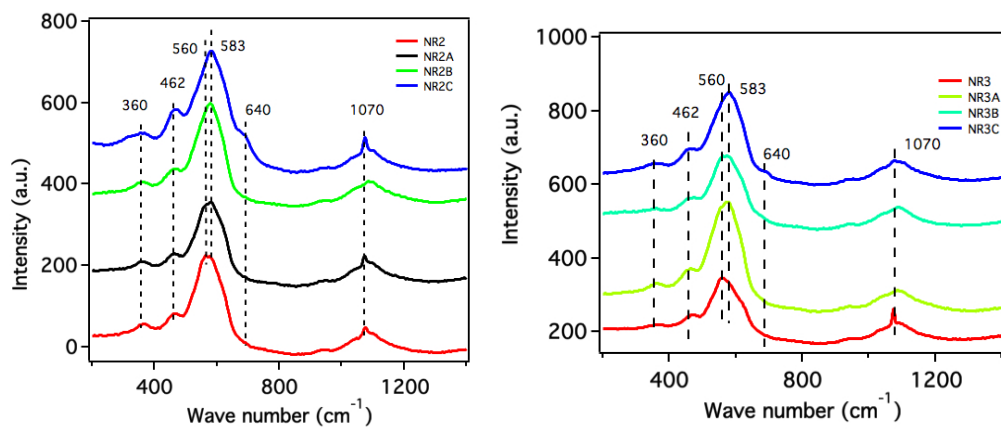

**Figure S2.** Raman Spectrum of the sample produced.

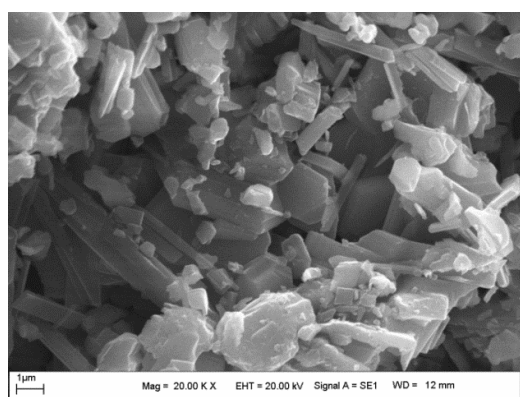

(a)

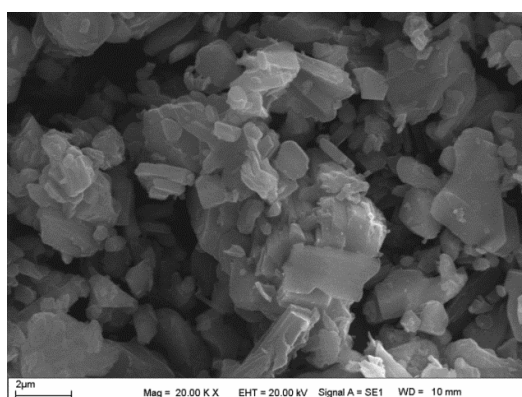

(b)

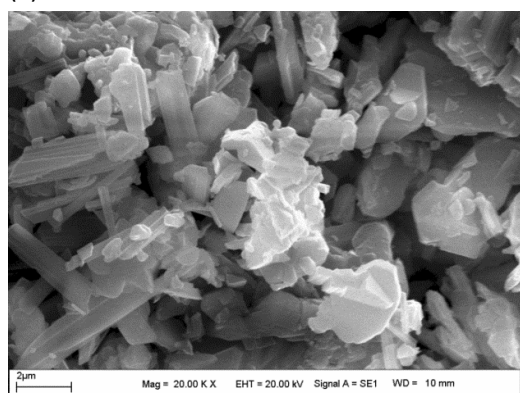

(c)

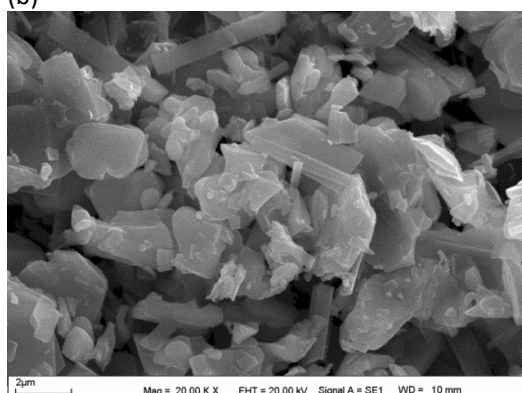

(d)

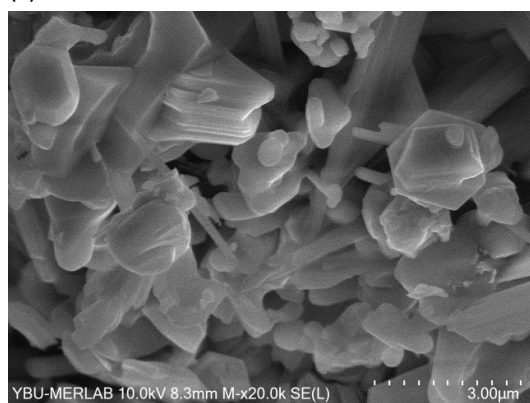

(e)

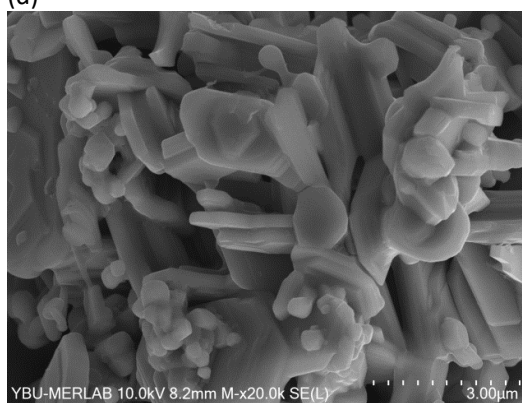

(f)

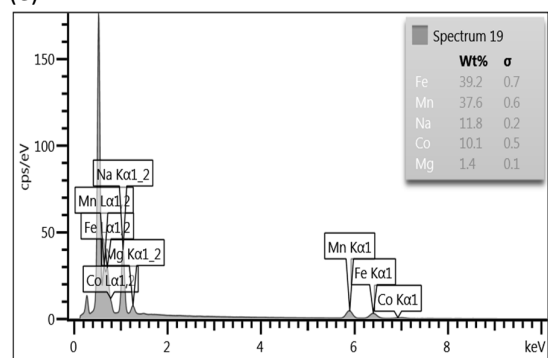

(g)

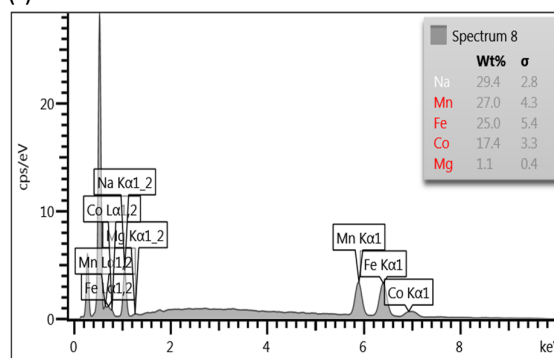

(h)

**Figure S3.** SEM images of (a) NR1, (b) NR2, (c) NR3, (d) NR4, (e)NR2B (f)NR3A, and EDX data of (g) NR2B and NR3A

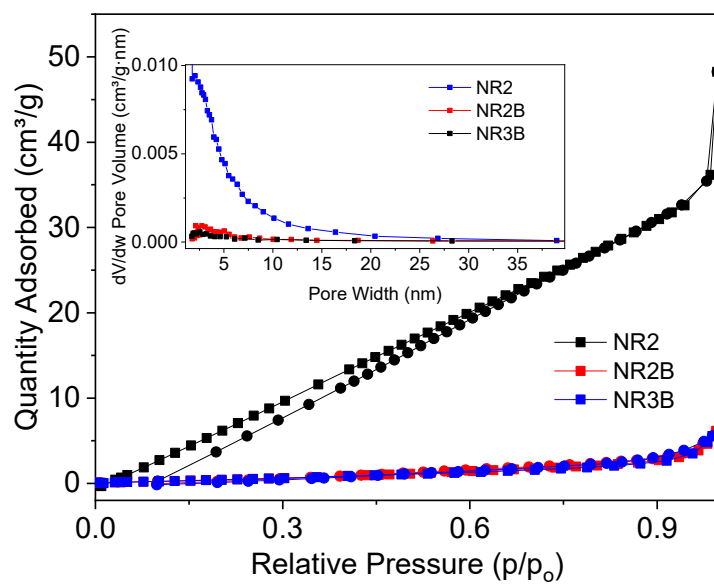

**Figure S4.** BET analysis results of NR2, NR2B and NR3B

**Table S2.** BET data of NR2, NR2B and NR3B

| Sample | BET surface area, m <sup>2</sup> /g |
|--------|-------------------------------------|
| NR2    | 32.0                                |
| NR2B   | 2.4                                 |
| NR3B   | 2.1                                 |

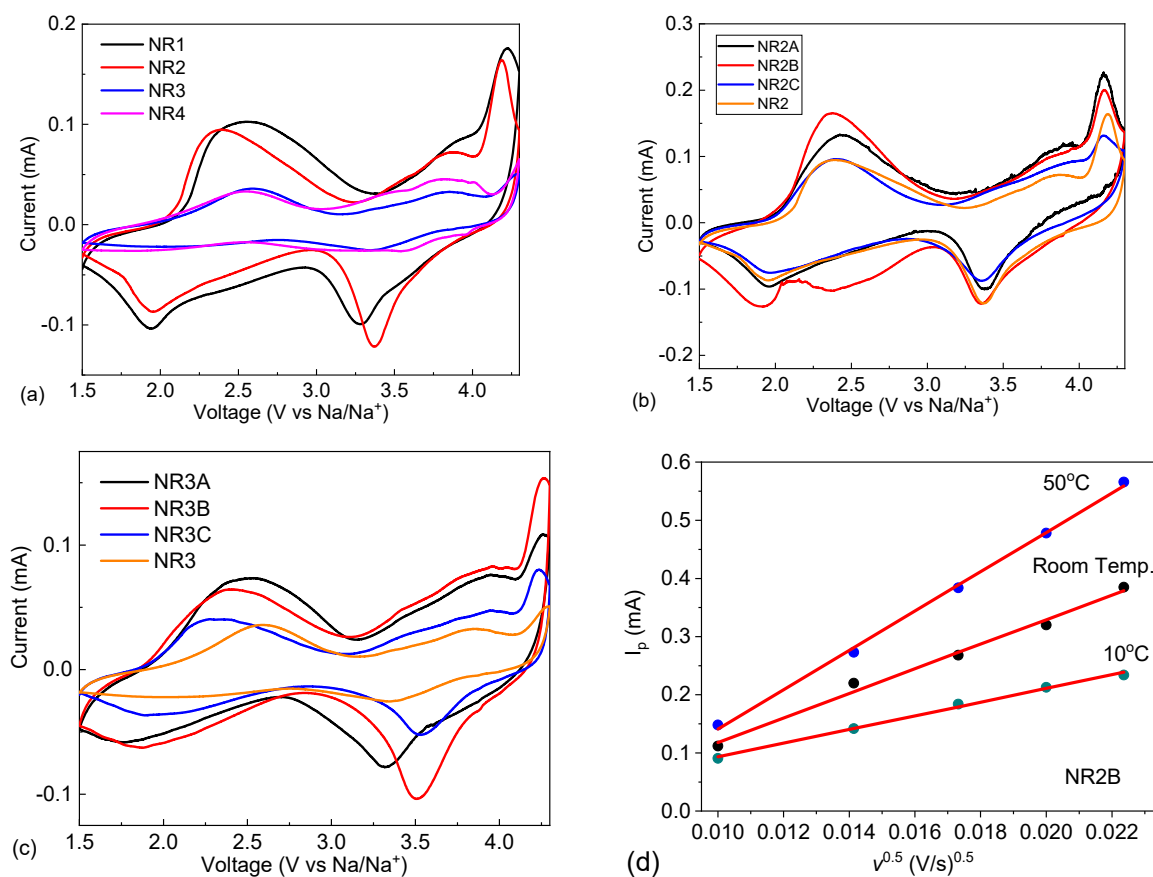

**Figure S5.** CV graphs of (a) NR0, NR1, NR2, NR3 and NR4, (b) NR2, NR2A, NR2B and NR2C and (c) NR3, NR3A, NR3B and NR3C

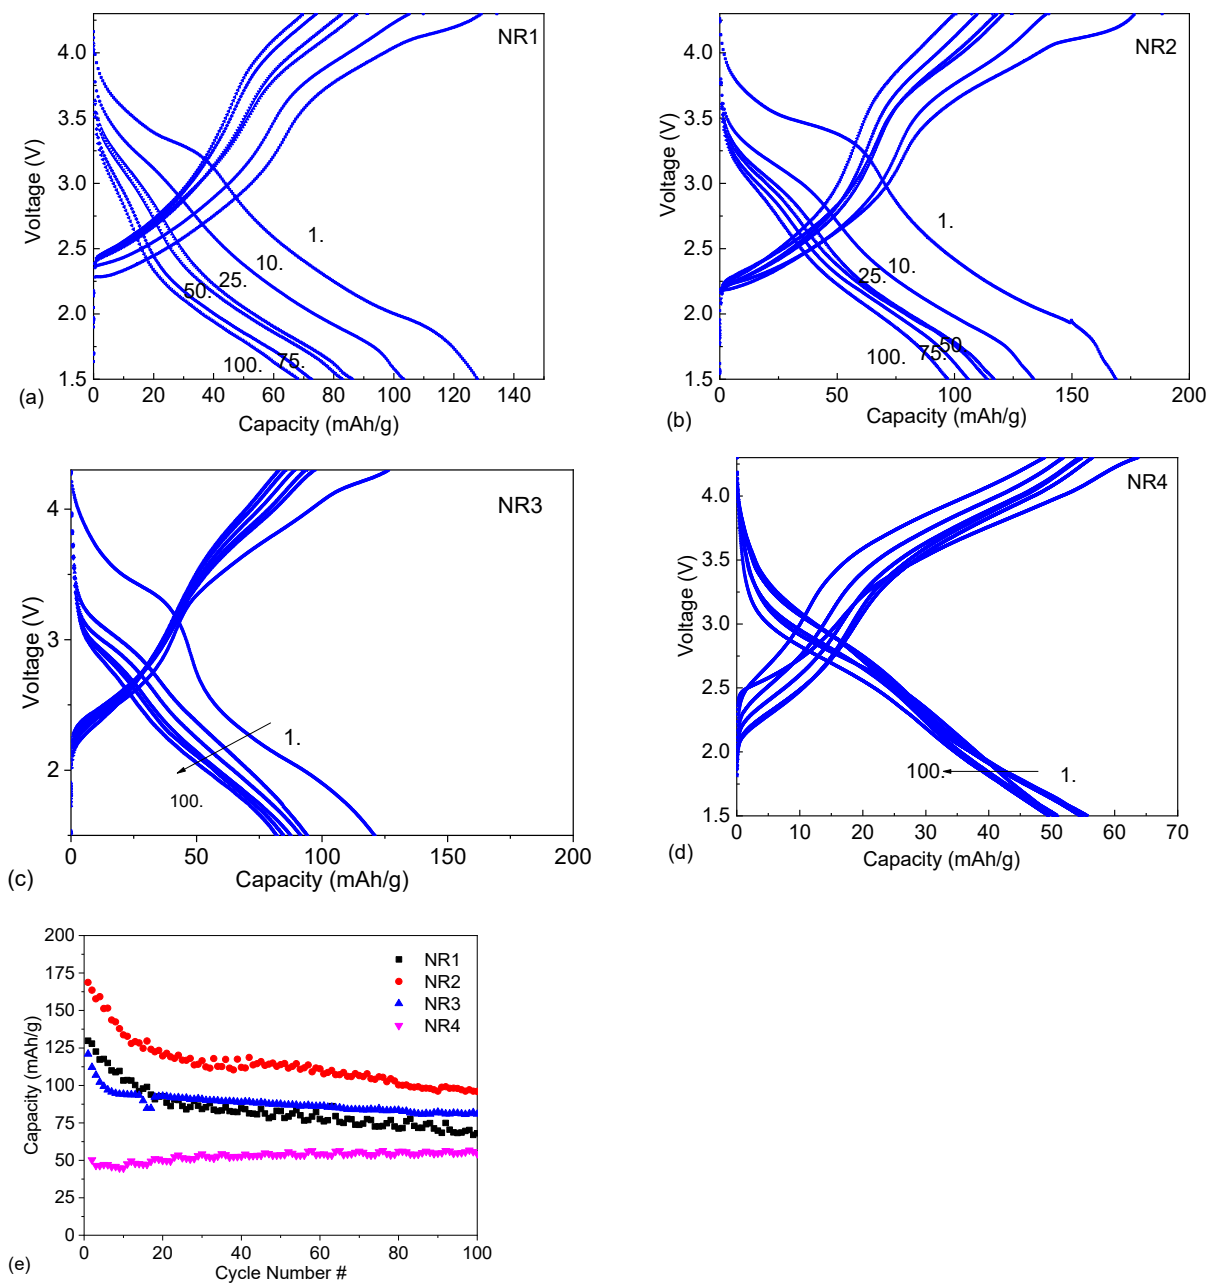

**Figure S6.** Charge-discharge curves for (a) NR1, (b) NR2, (c) NR3, (d) NR4 and (e) their cycling stability.

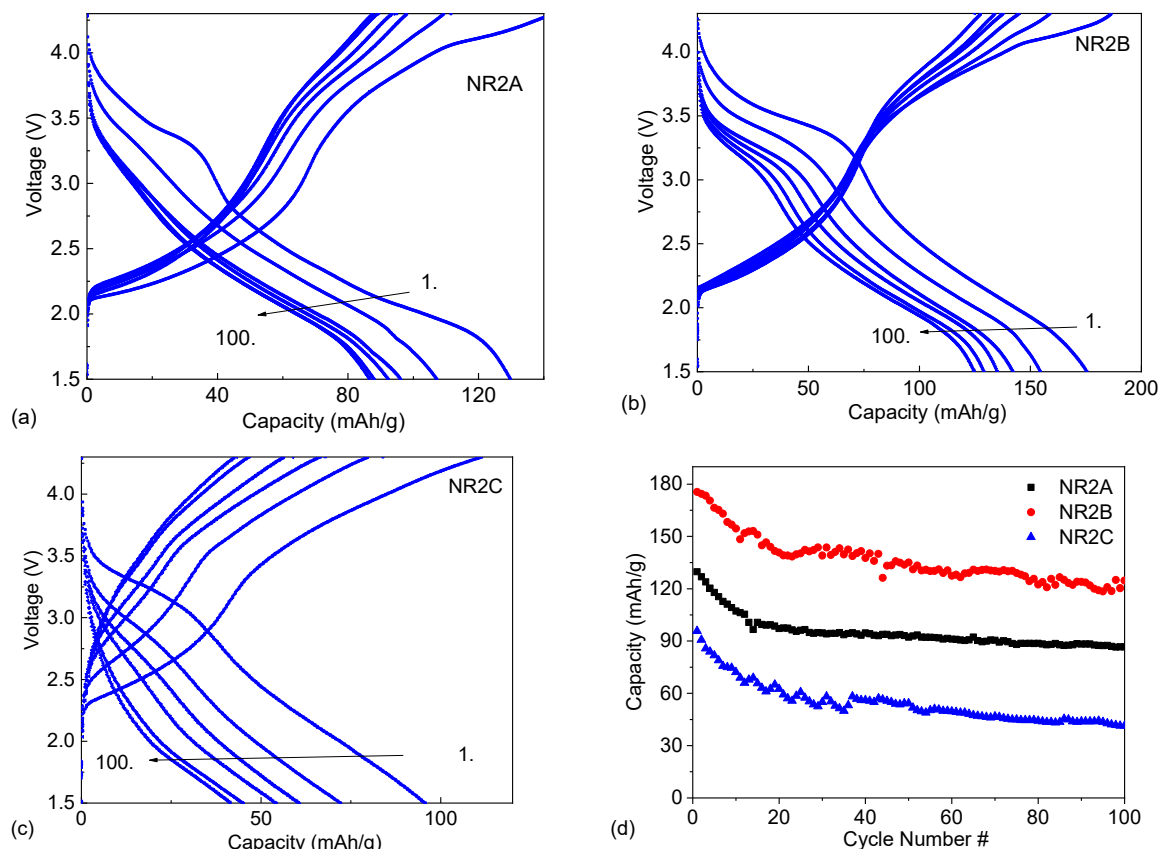

**Figure S7.** Charge-discharge curves for (a) NR2A, (b) NR2B, (c) NR2C, and their (d) cycling stability.

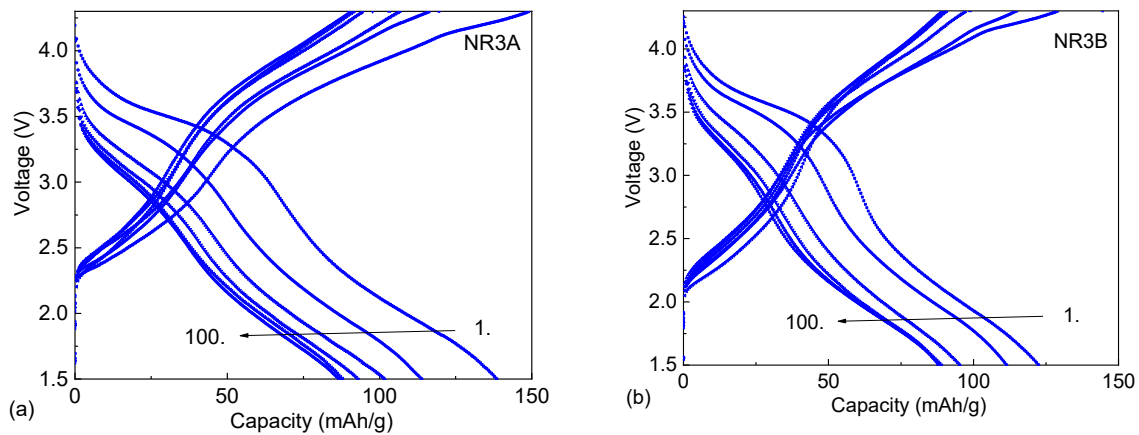

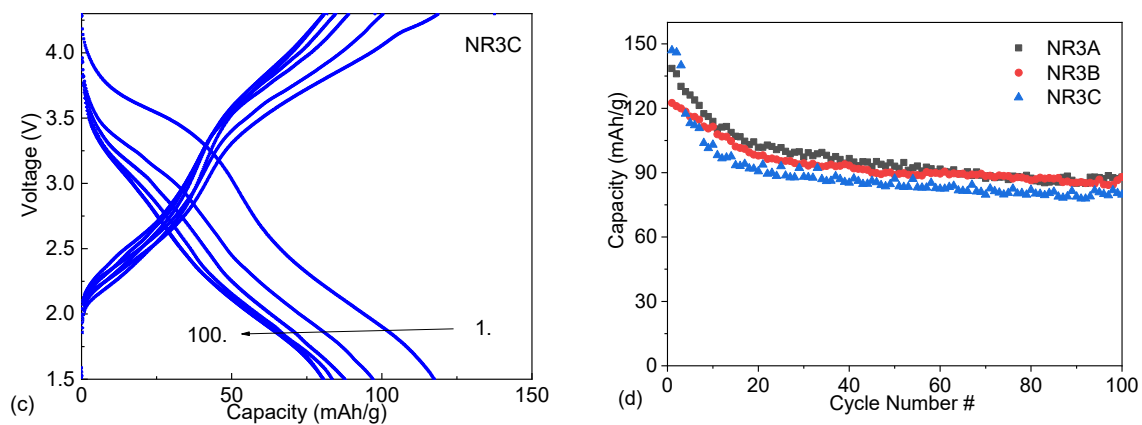

**Figure S8.** Charge-discharge curves for (a) NR3A, (b) NR3B, (c) NR3C, and their (d) cycling stability.

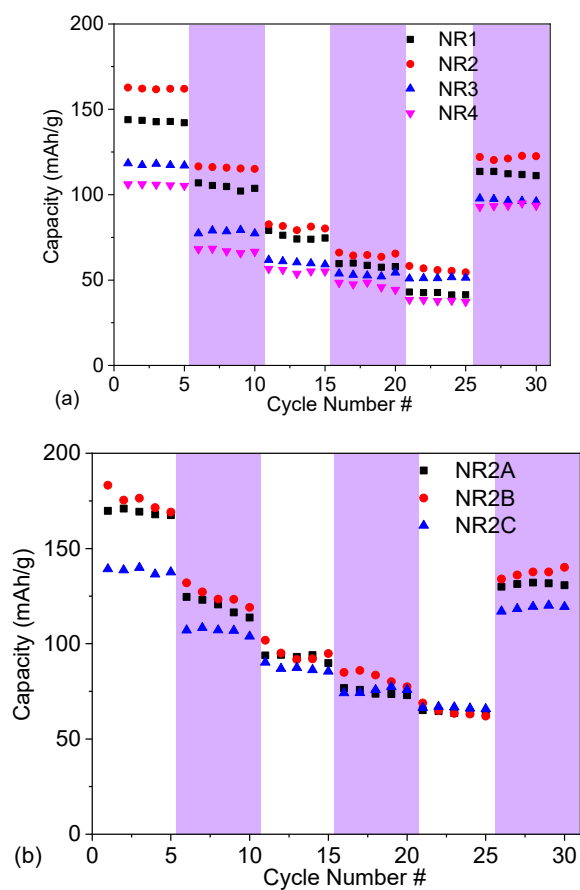

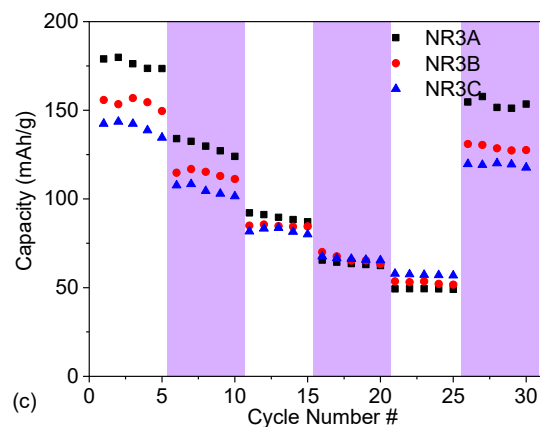

**Figure S9.** C-rate graphs of (a) NR0, NR1, NR2, NR3 and NR4, (b) NR2, NR2A, NR2B and NR2C and (c) NR3, NR3A, NR3B and NR3C for 10-40-80-120-150-10 mA/g current rate respectively.

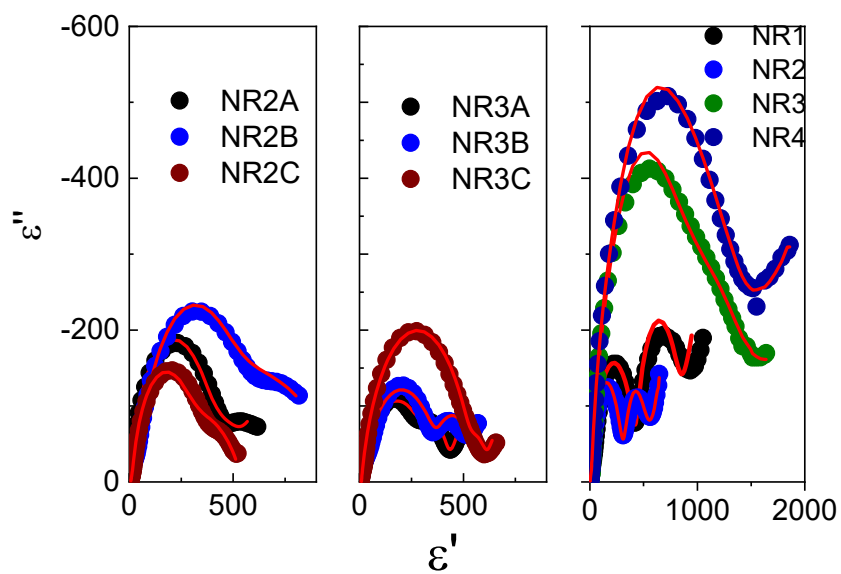

**Figure S10.** EIS graphs of the cells.

**Table S3:** EIS fitting parameters of the cells.  $Q = \frac{1}{Q_y} \frac{1}{s^{q_a}}$

| Parameters | Rs   | Rc   | C x 10 <sup>-3</sup>  | Rq   | Qy                     | Qs    | W                     |
|------------|------|------|-----------------------|------|------------------------|-------|-----------------------|
| NR1        | 7.32 | 343  | 1.76                  | 419  | 1.16 10 <sup>-5</sup>  | 0.803 | 1.57 10 <sup>-2</sup> |
| Nr2        | 7.85 | 1902 | 1.58                  | 298  | 1.57 10 <sup>-5</sup>  | 0.903 | 1.89 10 <sup>-2</sup> |
| NR3        | 5.28 | 562  | 1.68                  | 937  | 26.7 10 <sup>-5</sup>  | 0.567 | 1.59 10 <sup>-2</sup> |
| NR4        | 4.28 | 1150 | 1.47 10 <sup>-3</sup> | 1800 | 8.84 10 <sup>-5</sup>  | 0.639 | 1.94 10 <sup>-3</sup> |
| NR2A       | 5.46 | 3010 | 6.49 10 <sup>-6</sup> | 2350 | 0.51 10 <sup>-5</sup>  | 0.560 | 9.451 0 <sup>-3</sup> |
| NR2B       | 7.09 | 2970 | 1.52 10 <sup>-5</sup> | 7250 | 0.43410 <sup>-5</sup>  | 0.434 | 4.39 10 <sup>-3</sup> |
| NR2C       | 6.49 | 2050 | 9.71 10 <sup>-6</sup> | 3340 | 0.498 10 <sup>-5</sup> | 0.527 | 5.18 10 <sup>-3</sup> |
| NR3A       | 5.92 | 84   | 0.883                 | 323  | 4.54 10 <sup>-5</sup>  | 0.716 | 2.07 10 <sup>-2</sup> |
| NR3B       | 8.25 | 109  | 2.3                   | 372  | 4.51 10 <sup>-5</sup>  | 0.718 | 1.93 10 <sup>-2</sup> |
| NR3C       | 8.72 | 50.7 | 3.65                  | 530  | 2.15 10 <sup>-5</sup>  | 0.813 | 2.55 10 <sup>-2</sup> |

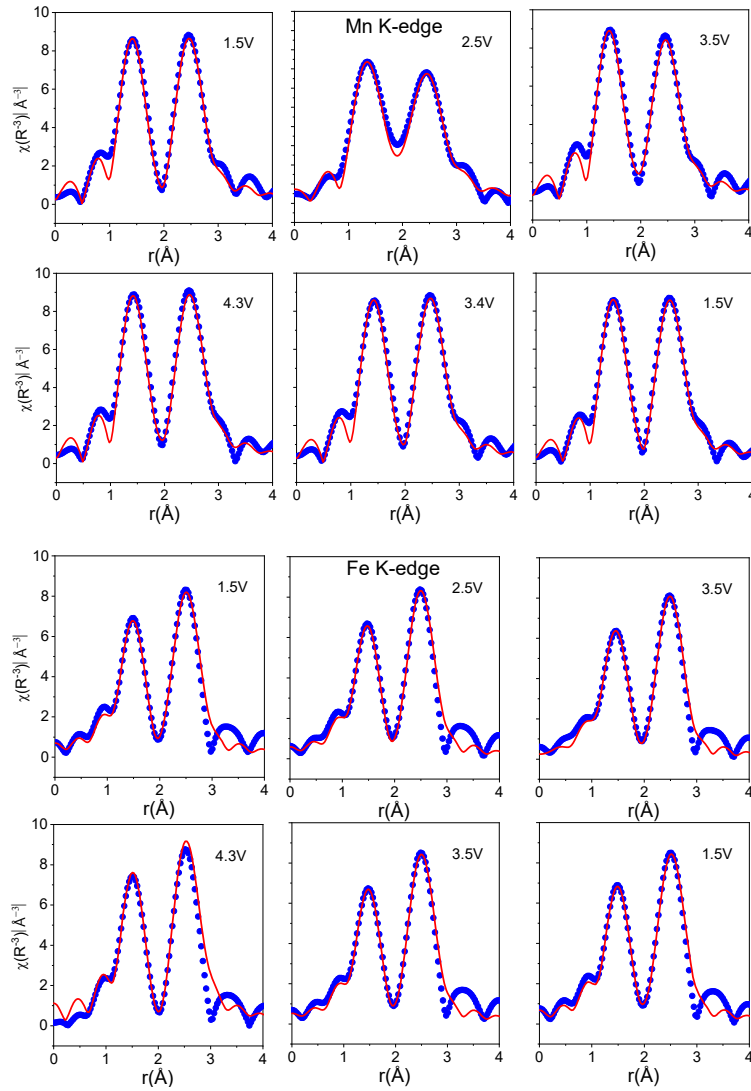

**Figure S11.** Artemis fitting of NR2B cells for Mn and Fe k edge for different voltage values
